# Supplementary material for: FluentDNA: Nucleotide Visualization of Whole Genomes, Annotations, and Alignments
Source: Front Genet. 2020 Apr 30;11:292. doi: 10.3389/fgene.2020.00292 (PMC7203487; doi:10.3389/fgene.2020.00292)
Supplement: TABLE S1 — Statistics of human (Hg38) versus chimpanzee (PanTro6) whole genome alignment. [file Table_1.xlsx]

## Sheet: All Chromosomes
	Total	chr1	chr2	chr3	chr4	chr5	chr6	chr7	chr8	chr9	chr10	chr11	chr12	chr13	chr14	chr15	chr16	chr17	chr18	chr19	chr20	chr21	chr22	chrX	chrY
Reference Length (N's included) (independent calc)	3088269832	248956422	242193529	198295559	190214555	181538259	170805979	159345973	145138636	138394717	133797422	135086622	133275309	114364328	107043718	101991189	90338345	83257441	80373285	58617616	64444167	46709983	50818468	156040895	57227415
Reference length (No N's) (independent)	2937639113	230481012	240548228	198100135	189752667	181265378	170078522	158970131	144768136	121790550	133262962	134533742	133137816	97983125	90568149	84641325	81805943	82920204	80089605	58440758	63944257	40088619	39159777	154893029	26415043
Total alignment Length	2807378393	223748543	233574601	191952958	183937280	174187611	165682179	152019843	139291886	116077103	127853000	128051712	127678479	94598628	86459295	80488359	78021879	76812033	73435961	53190024	59622797	36460083	35775900	145390519	23067720
Unaligned sequence within reference	149173906	8720120	8260400	6981350	6721519	8377245	5024550	8153166	6336318	6501557	6082908	7284509	6103971	3849601	4245909	4447223	4824479	6846475	6855876	5993312	4674499	3798511	3699846	10676764	4713798
Alignment length / Reference length	0.955658	0.970789	0.971009	0.968969	0.969353	0.960954	0.974151	0.956279	0.962172	0.953088	0.959404	0.951819	0.958995	0.965458	0.954632	0.950935	0.953743	0.926337	0.916923	0.910153	0.932418	0.909487	0.913588	0.938651	0.87328
Identical bases within alignment	2769610997	220917707	230534885	189497504	181435990	171933266	163553827	149955018	137307451	114437369	126144862	126357568	126059664	93347690	85325045	79377739	76802346	75807242	72457276	52358698	58788482	35871105	35177263	143853741	22309259
Non-identical bases within alignment	37767396	2830836	3039716	2455454	2501290	2254345	2128352	2064825	1984435	1639734	1708138	1694144	1618815	1250938	1134250	1110620	1219533	1004791	978685	831326	834315	588978	598637	1536778	758461
Identical bases / Alignment length	0.986547	0.987348	0.986986	0.987208	0.986401	0.987058	0.987154	0.986417	0.985753	0.985874	0.98664	0.98677	0.987321	0.986776	0.986881	0.986201	0.984369	0.986919	0.986673	0.984371	0.986007	0.983846	0.983267	0.98943	0.96712
Number of gaps introduced in reference by alignment	2139409	165609	170672	137201	139495	127304	123905	119253	103879	90319	95484	92132	96419	71882	65255	63744	66458	64312	55079	53722	45779	33180	33888	89016	35422
Ref Gaps larger than 10bp	241691	18763	18015	13383	13788	12607	12484	14143	11382	10275	11050	9946	9907	7416	6801	6843	9996	8164	5861	7683	5898	4281	5000	10685	7320
Ref Gaps larger than 100bp	54321	4479	3618	2374	2773	2396	2308	3573	2359	2207	2504	1971	1901	1638	1370	1455	2892	1826	1129	1990	1291	1027	1311	2703	3226
Ref Gaps larger than 1000bp	18911	1655	1187	718	912	828	688	1277	739	845	819	677	586	506	462	578	1127	598	323	667	405	326	481	1077	1430
Ref N to query bp	150636009	18475471	1645301	195424	461888	272881	727457	376941	370500	16604167	534460	552880	137493	16381203	16475569	17349864	8533476	337994	283680	176858	500575	6621364	11659387	1147971	30813205
Query N to ref in bp	15139025	2495044	512888	454701	880917	712412	424267	2041529	9448	240403	1197562	8258	5774	402562	475733	1518735	355075	853093	421540	509942	65675	180762	278066	1094639	0
Number of gaps introduced in query by alignment	2216928	171053	178311	142805	145896	131709	125787	124269	107404	95198	98327	94230	98479	74740	66865	66261	70208	64542	56834	54235	47098	35036	35142	97074	35425
Query Gaps larger than 10bp	266110	21270	20429	15560	15261	14357	13711	15879	12314	10949	12245	10997	11165	8273	7557	7551	10578	8707	6424	8220	6115	4377	5098	11746	7327
Query Gaps larger than 100bp	53587	4832	3701	2525	2840	2518	2331	3533	2183	2123	2354	1996	1887	1586	1328	1404	2723	1727	1148	1978	1104	909	1200	2534	3123
Query Gaps larger than 1000bp	17145	1943	1068	662	832	725	633	1163	565	713	620	598	465	408	440	478	969	550	283	608	335	323	443	950	1371
Centromeric sequence length	72352500	3370400	2076300	3157700	2077200	4186600	1549700	4162600	2802300	2600400	2862200	4463500	3252100	2049700	2306200	2779400	2481000	4171000	5434500	3408800	3163400	2244000	2516800	4574000	662700
Reference length minus centromeres	2865286613	227110612	238471928	194942435	187675467	177078778	168528822	154807531	141965836	119190150	130400762	130070242	129885716	95933425	88261949	81861925	79324943	78749204	74655105	55031958	60780857	37844619	36642977	150319029	25752343
Alignment length / Reference length minus centromeres	0.97979	0.985196	0.979464	0.984665	0.980082	0.983673	0.983109	0.981993	0.981165	0.973882	0.980462	0.984481	0.983006	0.986086	0.979576	0.983221	0.983573	0.975401	0.98367	0.96653	0.980947	0.963415	0.976337	0.967213	0.895752
Identical bases / Reference length minus centromeres	0.966609
			Note: Chr2A and chr2B were combined into the same list and resorted by score.
	Total	chr1	chr2	chr3	chr4	chr5	chr6	chr7	chr8	chr9	chr10	chr11	chr12	chr13	chr14	chr15	chr16	chr17	chr18	chr19	chr20	chr21	chr22	chrX	chrY
Primary Chain	1515195490	114984699	124837690	102292762	102404731	44644988	107751895	90353609	58120074	50569308	86709438	48114280	63230073	62370844	85021656	69081961	38655719	33475161	58288802	28339269	32528719	32285226	27760708	48866364	4507514
First Two Chains	2258793506	188398140	195592657	191036976	127701947	71133305	161361608	140387084	96497462	89454020	123980669	94011435	92381491	87445742	85180600	73889080	55223212	51635953	72705936	50516523	57763891	32473339	29855569	82867553	7299314
First 3 Chains	2500972151	212843994	211287080	191117095	149671593	95936882	164380573	144691258	126838817	107005608	124487884	125843504	105788978	89790006	85221470	75656180	64139961	61506966	72710459	51430338	58095027	32627633	31328200	109515825	9056820
Non-syntenic, Same Chromosome	1228025096	104081729	107244972	89029377	79986252	112038574	56884384	59326241	80149115	60177384	39823372	78975113	63938230	31162967	513209	10205552	34476637	41881749	14511023	24405460	26698533	783172	5221818	95470175	11040058
Sum Coverage from Same Chromosome	2743220586	219066428	232082662	191322139	182390983	156683562	164636279	149679850	138269189	110746692	126532810	127089393	127168303	93533811	85534865	79287513	73132356	75356910	72799825	52744729	59227252	33068398	32982526	144336539	15547572
Translocation from Other Chromosomes	61862545	3834877	1490781	625415	1545241	17266605	1045473	2340038	1021778	5328211	1315050	571079	470757	745723	924394	1200080	4884563	1417764	635990	444370	395480	3390981	2766733	744372	7456790
% Syntenic Master Chain	0.528811	0.506294	0.52349	0.524733	0.545648	0.252119	0.639368	0.583651	0.409395	0.424274	0.664946	0.36991	0.486813	0.650147	0.963288	0.843884	0.487309	0.425086	0.780774	0.51496	0.53518	0.8531	0.7576	0.325084	0.175033
% Coverage First 2 Chains	0.788331	0.829544	0.820192	0.979966	0.68044	0.401704	0.957472	0.906849	0.679723	0.750515	0.950766	0.722774	0.711252	0.911525	0.965089	0.902606	0.696165	0.655701	0.973891	0.917949	0.950363	0.85807	0.814769	0.551278	0.283443
% Coverage First 3 Chains	0.872852	0.937182	0.886004	0.980377	0.797502	0.541775	0.975386	0.934653	0.893446	0.897772	0.954656	0.967504	0.814477	0.935962	0.965552	0.924193	0.808572	0.781049	0.973952	0.934554	0.955811	0.862147	0.854958	0.728556	0.351689
% Coverage from Same Chromosome	0.957398	0.96458	0.973207	0.981429	0.971842	0.884824	0.976903	0.966877	0.973961	0.92916	0.970338	0.977083	0.979078	0.974987	0.969102	0.968552	0.921934	0.956923	0.975149	0.958438	0.974439	0.873794	0.900105	0.960201	0.603734
% of All Coverage	0.978989	0.981466	0.979459	0.984637	0.980076	0.982332	0.983106	0.981993	0.981158	0.973863	0.980423	0.981473	0.982703	0.98276	0.979576	0.983212	0.983511	0.974926	0.983668	0.966513	0.980946	0.963397	0.97561	0.965153	0.893292
First Chain Coverage (Including Centromeres)	0.490629
2 Chains Coverage (Including Centromeres)	0.731411
3 Chain Coverage (Including Centromeres)	0.80983
% Same Chromosome (Incl. Centromeres)	0.888271
Reference coverage with N's included	0.908302
QA: 1 < 2 < 3	TRUE	TRUE	TRUE	TRUE	TRUE	TRUE	TRUE	TRUE	TRUE	TRUE	TRUE	TRUE	TRUE	TRUE	TRUE	TRUE	TRUE	TRUE	TRUE	TRUE	TRUE	TRUE	TRUE	TRUE	TRUE
Methodological error (N's in aligned region)	-0.000801058	-0.00373051	-4.85592e-06	-2.7721e-05	-5.62673e-06	-0.00134089	-2.53369e-06	2.90684e-07	-6.47339e-06	-1.84579e-05	-3.94169e-05	-0.00300791	-0.00030349	-0.0033262	-4.07877e-07	-9.35722e-06	-6.25276e-05	-0.000474405	-1.95566e-06	-1.68084e-05	-1.06942e-06	-1.86024e-05	-0.000727042	-0.00205967	-0.00246028

## Sheet: chr18
Hg38ToPanTro6 chr18
Ref Identity within Alignment	0.9867
Alignment Coverage of Ref Chr	0.9146	0.914613
Total alignment Length	73435961	73435961
Ref Chr Total Size (No N's)	80291837
Ref Number of Gaps (all)	55079
Query Number of Gaps (all)	56834
Query Gaps larger than 10bp	6424
Ref Gaps larger than 10bp	5861
Query Gaps larger than 100bp	1148
Ref Gaps larger than 100bp	1129
Query Gaps larger than 1000bp	283
Ref Gaps larger than 1000bp	323
Ref N to query bp	283680
Ref unique bp	6855876
Shared seq bp	72457276
Aligned Variance in bp	978685
Query unique bp	1233057
Query N to ref in bp	421540

## Sheet: Unique Genes Scrap
Chr 1
Start position in Ch1 (Fig 9)	Sequence	BLAST Chimp	Gene Feature		end bp	start (squish x5)	end (squish x5)
122005	GGCCCAGGGTAGGGAGGCCTGAGTGGGTGCAGGCCGGGCCCTGCTGAGGCCACTCTGCACACAGGCTGCAGCCCAGACGCCCCCCAGGCCGGGGCCACCATCAGCACCACCACCACCACCCAAGGAGGGGCACCAGGAGGGGCTGGTGGAGCTGCCCGCCTCGTTCCGGGAGCTGCTCACCTTCTTCTGCACCAATGCCACCATCCACGGCGCCATCCGCCTGGTCTGCTCCCGCGGGAACCGCCTCAAGACGACGTCCTGGGGGCTGCTGTCCCTGGGAGCCCTGGTCGCGCTCTGCTG	present (79% cov.)	amiloride-sensitive sodium channel subunit delta		122300	24401	24460
1782205	CAAGAATACAGTTATTTCTGTGAATCCATCCACAAAGCTGCAAGAAGGTGGCTCTGTGACCATGACCTGTTCCAGCGAGGGTCTACCAGCTCCAGAGATTTTCTGGAGTAAGAAATTAGATAATGGGAATCTACAGCACCTTTCTGGAAATGCAACTCTCACCTTAATTGCTATGAGGATGGAAGATTCTGGAATTTATGTGTGTGAAGGAGTTAATTTGATTGGGAAAAACAGAAAAGAGGTGGAATTAATTGTTCAAGGTGAGTAGAATGTGAAAAAGGAATGATAAAGGTGCTGTCA	missing	vascular cell adhesion protein 1 isoform b precursor		1782500	356441	356500
5892205	TGAAATCTAGCTGGGGCTGTGTGGTTTCTGATTCCCCCTGGCTTATTCTTTACTTTTTCCCACTTTTCCAGGCTCAGCAGGGAGCTGCTGGATGAGAAAGGGCCTGAAGTCTTGCAGGACTCACTGGATAGATGTTATTCAACTCCTTCAGGTTGTCTTGAACTGACTGACTCATGCCAGCCCTACAGAAGTGCCTTTTACATATTGGAGCAACAGTGTGTTGGCTTGGCTGTTGACATGGATGGTGAGTACCTTTCTATGAAGGTGATAAGGATCCACTGAGTCTTCTGGTTAGGGTCA	present	neuroblastoma breakpoint family member 19		5892500	1178441	1178500
5966905	CTGTCCCCAGGTGGCAGCTGAACCTGAAGCTGGTTCCGTGGCCGGGGCCAGAGTGACATCCTGTCCCTGAGTGGTGGAGGAGCCTGAACCGGGGCTGTGGCTGGAGAGTACGCTGCTGGTCATACTCACAGCATTCTTCTCAGTAGAGCTGGGCACTGAACTTCTCTGGGTAGCCGAAGTCTCCTTTTCTCCACCTGGGGTAGAGCTTGCATGACCAGAACCCGTAACAACTGTTGCGGGTTTAGGGGCTGTGGTAGCTGTAAGAAGTTAAAGTCATAGGGTTGG	present (92% cov)	mucin-1 isoform 19 precursor		5967200	1193381	1193440
7216105	GACTTCTGCCAGCTCGCTTCTGCTCTGCTGATGGCCTCATCCTGCCACTGTGGCTTTTCAGGCTCTTCCTCCTCTTGCCCTGGCGGACGTGGGGCCCCACTCTGGCTTTCTTCTTTGTACCAGGCCCTCGCAATGTATTCTTGCTGCTTGTAGGAGAAGCCAGCTTCTTGGAGGAGCCTTTCTCAGACAAACCCTGGGCTGGGCCAGAAGCTAAGGTTGCACTGGAAGATTTTCTAGCAGCTTTCTCTGATTGTTCCTTTAGCAAGTCCAAGACTGTCTCTGAGAAATCAGTATTTATTT	present	HHIP-like protein 2 precursor		7216400	1443221	1443280
7225305	CCTGTGATTATCCGAGTTCTAGTAAGCAGAAATCAAACAACTCTGTACATTTGTTACCTGCTTCATCTTCAGCAAAGGAGATGATGAACTTGCTATGGGTGCTGATCAGCCCTGGGAAGGCACAGGACGTGGTGCTGCCCAGGCAAAGATCCTGCTTCTTCCATTTCTTGTTTTTTCTATCTTCCTGCAAAGCCATAAGTCGACTAGACAAAAAATAAACCCTTATGTTTAGGAATCCATATATCCACTCTGCAGAATACTTTTTCTCCTAGAATCAGAGATCCCTGAGTACTAGGACTG	present	HHIP-like protein 2 precursor		7225600	1445061	1445120
7711805	CAGCACTCTGCACCTCCCAACTGCAGGTAGAAGTACATCTGGGTGCCACACCCAAGGACCGAGATGGTCTTGTCTTTGGCCAGCTGGTTCACCAGCATTTTGGGGACAGTGACAGAAATATATGTCAAGTCTATGAGTGAGAGCTGGTTTATAAAGAAGTACATGGGAGTATGCAGAGAGGAGTCAATGTGGATCAGAAGTATCAATGTAATATTCCAAGACACAGCCATCAAAAATATACTGAAGATAAGCAAGCAGAGGCGGCCAGGGT	missing (73% ident homolog)	olfactory receptor 2T10		7712100	1542361	1542420
5923605	skipped due to fragmentation				5923900	1184721	1184780
									verified
								Human Genome with Gencode30 Genes	deepzoom	18,20,19 partial	includes alts
								Human Genome with Gencodev30 Genes	deepzoom	18,20,19 partial
								Human Genome Hg38 with Gencodev30 Genes	image, no deepzoom
								/science/projects/buggs_lab/josiah/FluentEnv/lib/python3.6/site-packages/DDV/www-data/dnadata/Human Genome Hg38 with Gencodev30 Genes/sources/Human Genome Hg38 with Gencodev30 Genes.png
								Re-rendered for Deepzoom
